# Supplementary material
Source: PubMed Central journal article supplement (PMC8826750)
Supplement: NIHMS1566653-supplement-Suppl__Alves-Bezerra.pdf [file NIHMS1566653-supplement-Suppl__Alves-Bezerra.pdf]

## Supplemental data

**Supplementary Table 1: Primer sequences used in the present study.**

| <b>Primer</b>                         | <b>Sequence (5' - 3')</b>                    |
|---------------------------------------|----------------------------------------------|
| <b>Primers used in RACE reactions</b> |                                              |
| <i>RhoprGpat1_R1</i>                  | TAGCCTCGGTACGCGATTTG                         |
| <i>RhoprGpat1_R2</i>                  | CGTTGGGTCGGTCATCGTT                          |
| <i>RhoprGpat1_R3</i>                  | GATAATGAAACCCTTTGAAGGTTA                     |
| <i>RhoprGpat1_R4</i>                  | CGATCGGTGCCCTAATATTGT                        |
| <i>RhoprGpat1_R5</i>                  | TTACGTTTTTCATCTTGTAAGA                       |
| <i>GeneRacer RNA Oligo</i>            | CGACUGGAGCACGAGGACACUGACAUGGACUGAAGGAGUAGAAA |
| <b>Primers used in qPCR reactions</b> |                                              |
| <i>RhoprGpat1_F</i>                   | TTGTCTGCGACGAACAAGGA                         |
| <i>RhoprGpat1_R</i>                   | AACCGTCGGGTTGCTTCTCT                         |
| <i>RhoprGpat4_F</i>                   | GGGCGATTGTTTGCGATGTA                         |
| <i>RhoprGpat4_R</i>                   | ACGGCTTTAACCCTGTTAGCAA                       |
| <i>RhoprAcc_F</i>                     | TGGGCTGGAACCGTAGTTGCG                        |
| <i>RhoprAcc_R</i>                     | TGCGGGATCGGCTGGAAGTTGT                       |
| <i>RhoprAcsl1_F</i>                   | GTGGTTAAAAGCTGGGCTGT                         |
| <i>RhoprAcsl1_R</i>                   | CCCCAAGTTATCAAATCATCCA                       |
| <i>RhoprAcsl2_F</i>                   | TAGCCGTAATGGCAGAACGC                         |
| <i>RhoprAcsl2_R</i>                   | CCATGGGCAGCTAATTCTGC                         |
| <i>RhoprAcbp1_F</i>                   | GGGACTGTAATACGAGCAA                          |
| <i>RhoprAcbp1_R</i>                   | TTCAATCCATAAGATGCAATCA                       |
| <i>RhoprDgat_F</i>                    | ATGCAACTGGCATAGCTCCG                         |

|                    |                          |
|--------------------|--------------------------|
| <i>RhoprDgat_R</i> | GCGATTGGCTTTCCAACACTACAG |
| <i>RhoprCpt1_F</i> | AAACACCACATGGCCAAACT     |
| <i>RhoprCpt1_R</i> | GAAACGCCGTATCCATCATC     |
| <i>Rhopr18S_F</i>  | TCGGCCAACAAAAGTACACA     |
| <i>Rhopr18S_R</i>  | TGTCGGTGTAACCTGGCATGT    |

---

**Primers used for dsRNA synthesis**

|                          |                                               |
|--------------------------|-----------------------------------------------|
| <i>RhoprGpat1_RNAi_F</i> | TAATACGACTCACTATAGGGTACTGAGAGCTGACTGGTGCGCCAA |
| <i>RhoprGpat1_RNAi_R</i> | TAATACGACTCACTATAGGGTACTACATCCACACTGTCCCCGCTG |
| <i>T7 minimal</i>        | TAATACGACTCACTATAGG                           |

---

**Supplementary Table 2: GPAT sequences used in phylogenetic analyses.**

| <b>Protein</b>    | <b><sup>a</sup>Access number</b> | <b>Organism</b>                |
|-------------------|----------------------------------|--------------------------------|
| <b>AcypiGPAT1</b> | XP_008187136                     | <i>Acyrtosiphon pisum</i>      |
| <b>AcypiGPAT4</b> | XP_008178645                     | <i>Acyrtosiphon pisum</i>      |
| <b>AedaeGPAT1</b> | XP_001658107                     | <i>Aedes aegypti</i>           |
| <b>AedaeGPAT4</b> | XP_001656437                     | <i>Aedes aegypti</i>           |
| <b>AnogaGPAT1</b> | XP_313470                        | <i>Anopheles gambiae</i>       |
| <b>AnogaGPAT4</b> | XP_550721                        | <i>Anopheles gambiae</i>       |
| <b>ApimeGPAT1</b> | XP_006563437                     | <i>Apis mellifera</i>          |
| <b>ApimeGPAT4</b> | XP_006561095                     | <i>Apis mellifera</i>          |
| <b>BommoGPAT1</b> | XP_004933052                     | <i>Bombyx mori</i>             |
| <b>BommoGPAT4</b> | XP_012544997                     | <i>Bombyx mori</i>             |
| <b>CamflGPAT1</b> | XP_011251577                     | <i>Camponotus floridanus</i>   |
| <b>CamflGPAT4</b> | XP_011268666                     | <i>Camponotus floridanus</i>   |
| <b>DanreGPAT1</b> | XP_009305069                     | <i>Danio rerio</i>             |
| <b>DanreGPAT2</b> | NP_001082849                     | <i>Danio rerio</i>             |
| <b>DanreGPAT3</b> | NP_001002685                     | <i>Danio rerio</i>             |
| <b>DanreGPAT4</b> | NP_001035339                     | <i>Danio rerio</i>             |
| <b>DromeGPAT1</b> | NP_651597                        | <i>Drosophila melanogaster</i> |
| <b>DromeGPAT3</b> | NP_001286818                     | <i>Drosophila melanogaster</i> |
| <b>DromeGPAT4</b> | NP_726415                        | <i>Drosophila melanogaster</i> |
| <b>HomsaGPAT1</b> | NP_065969                        | <i>Homo sapiens</i>            |
| <b>HomsaGPAT2</b> | NP_997211                        | <i>Homo sapiens</i>            |
| <b>HomsaGPAT3</b> | NP_116106                        | <i>Homo sapiens</i>            |
| <b>HomsaGPAT4</b> | NP_848934                        | <i>Homo sapiens</i>            |

|                   |              |                                 |
|-------------------|--------------|---------------------------------|
| <b>MusmuGPAT1</b> | NP_032175    | <i>Mus musculus</i>             |
| <b>MusmuGPAT2</b> | NP_001074558 | <i>Mus musculus</i>             |
| <b>MusmuGPAT3</b> | NP_766303    | <i>Mus musculus</i>             |
| <b>MusmuGPAT4</b> | NP_061213    | <i>Mus musculus</i>             |
| <b>NasviGPAT1</b> | XP_008214603 | <i>Nasonia vitripennis</i>      |
| <b>NasviGPAT4</b> | XP_003424470 | <i>Nasonia vitripennis</i>      |
| <b>SacceGpt2p</b> | NP_012993    | <i>Saccharomyces cerevisiae</i> |
| <b>SacceSct1p</b> | NP_009542    | <i>Saccharomyces cerevisiae</i> |
| <b>TricaGPAT1</b> | XP_967684    | <i>Tribolium castaneum</i>      |
| <b>TricaGPAT4</b> | XP_008200644 | <i>Tribolium castaneum</i>      |
| <b>XenlaGPAT1</b> | NP_001091387 | <i>Xenopus laevis</i>           |
| <b>XenlaGPAT3</b> | NP_001087492 | <i>Xenopus laevis</i>           |
| <b>XenlaGPAT4</b> | NP_001085270 | <i>Xenopus laevis</i>           |

---

<sup>a</sup>Access number at NCBI database.

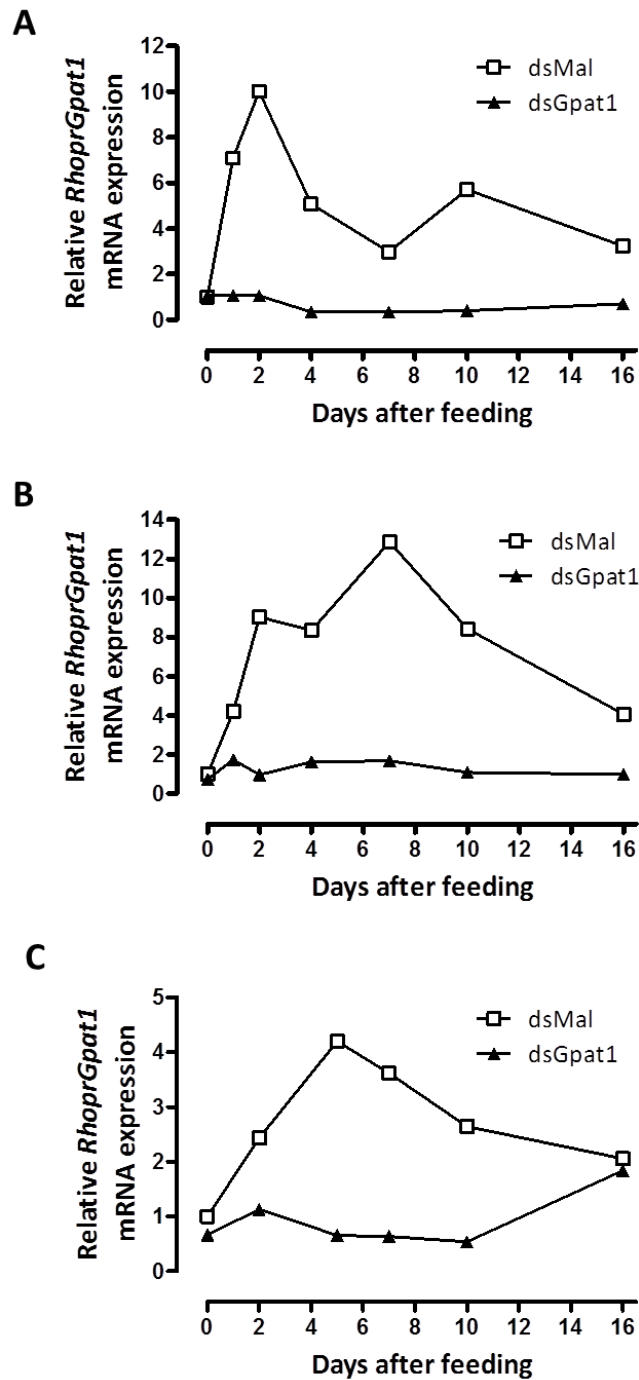

**Supplementary Figure 1: Persistence of *RhoprGpat1* knockdown.**

Fasted adult females were injected with dsRNA for *RhoprGpat1* or *Mal* (control) genes. Insects were fed on the third day after injection. (A) Anterior midgut, (B) posterior midgut and (C) fat body were obtained from adult females before (day 0) or on different days after feeding. Differences between cDNA levels were determined by qPCR analysis. mRNA expression levels are relative to unfed dsMal-treated insects, set as 1.0. The results represent the means of 2 independent experiments.

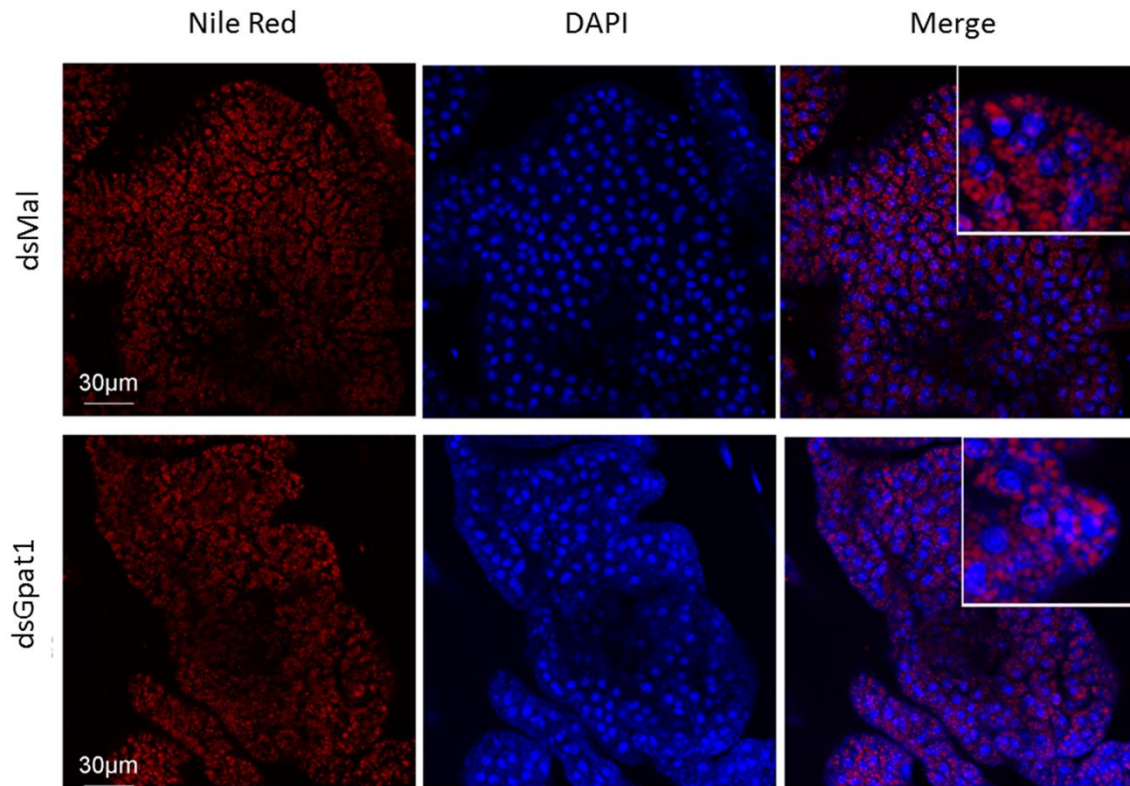

**Supplementary Figure 2: Lipid droplets morphology in unfed insects.**

Nile red stained-lipid droplets and DAPI-stained nuclei were imaged from optical sections of fat bodies from control and *RhoprGpat1*-silenced females before feeding. Representative images are shown. Scale bars = 30 µm.
